# Supplementary material for: Fungal-bacterial diversity and microbiome complexity predict ecosystem functioning
Source: PubMed Central journal article supplement (PMC6813331; doi:10.1038/s41467-019-12798-y), 2019-10-24
Supplement: 41467_2019_12798_MOESM1_ESM.pdf [file 41467_2019_12798_MOESM1_ESM.pdf]

# Supplementary Materials

## Fungal-bacterial diversity and microbiome complexity predict ecosystem functioning

Cameron Wagg, Klaus Schlaeppli, Samiran Banerjee, Eiko E. Kuramae, Marcel G. A. van der Heijden

This file contains:

- Figure S1. Taxonomy and richness of soil bacteria and fungi.
- [Figure S2. Relationships between richness and individual ecosystem functions](#)
- Figure S3. Number of taxa associated with number of functions.
- [Figure S4. Relationships between number of taxa supporting each function and the functional response](#)
- [Figure S5. Relationships of fungal and bacterial network functional complexity with individual ecosystem functions](#)
- [Figure S6. Relationships of fungal-bacterial network functional complexity with individual ecosystem functions](#)
- Table S1. Microbial community characteristics for each soil treatments
- Table S2. Microbial community characteristics per soil treatment after de-trending for richness.
- [Table S3. ANOVA results for effects of richness on individual functions and the residual unexplained variation among treatments.](#)
- Table S4. Taxonomy of soil fungi and bacteria linked to functions.
- Table S5. Similarity among functions in the microbial taxa they are linked to.
- Table S6. Effects of soil microbial community characteristics on multifunctionality using randomization tests.

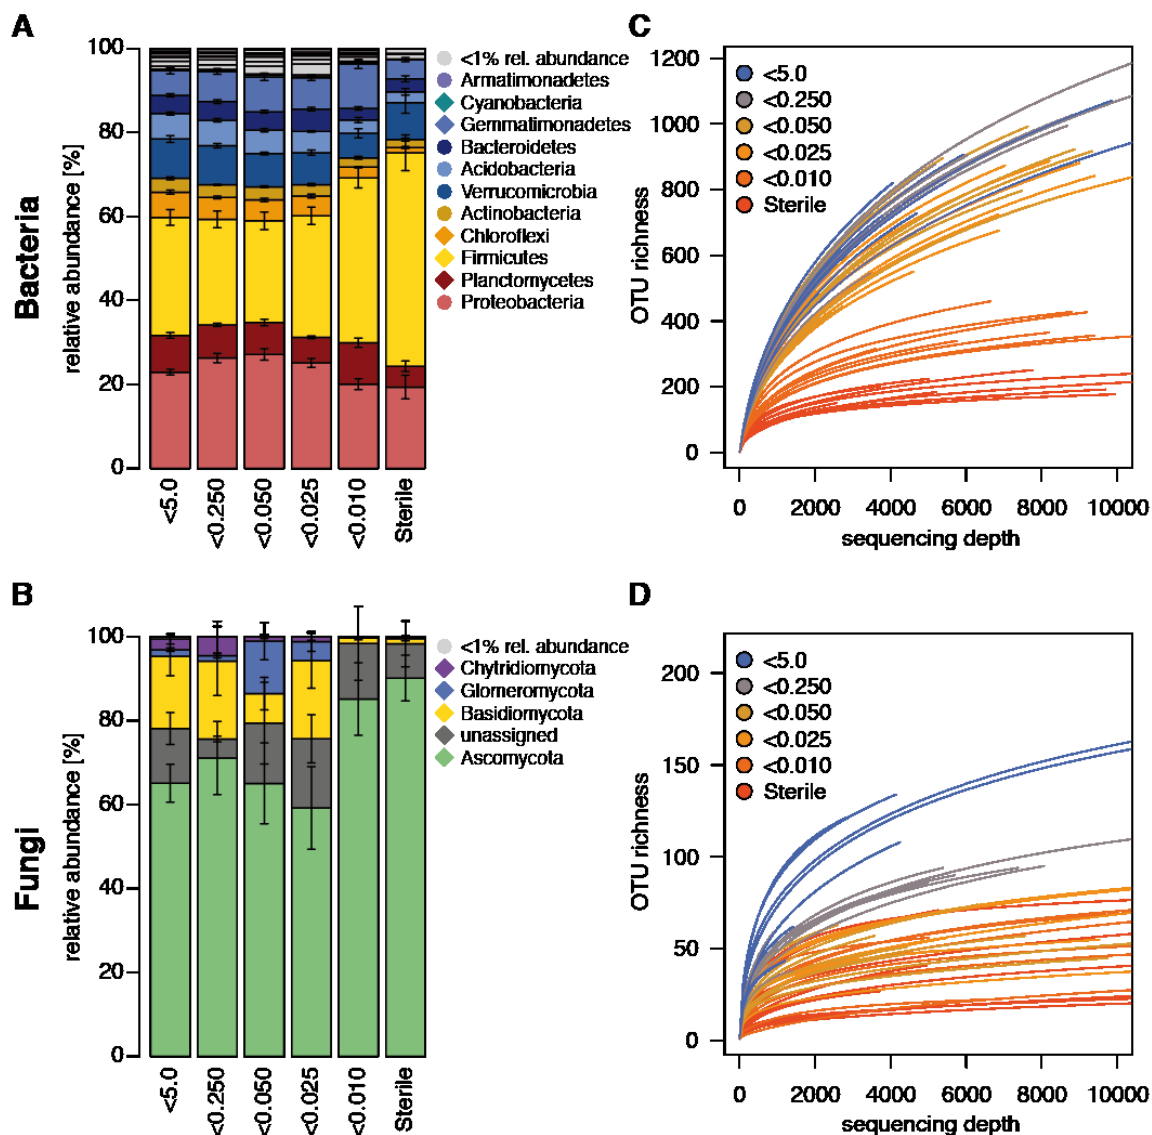

32

33

34 **Fig. S1. Taxonomy and richness of soil bacteria and fungi.** The taxonomic composition of  
 35 bacteria (per class) (A, C) and fungi (per phylum) (B, D) in microcosms with progressive  
 36 filtering of soil biota. (A, B). Phyla with mean ( $\pm$ s.e.m.) relative abundances  $>1\%$  are shown  
 37 and Phyla varying significantly between treatments are indicated with a diamond symbol in the  
 38 colour legend (ANOVA-like likelihood ratio test,  $P < 0.05$  (FDR)). (C, D) Rarefaction curves  
 39 depicting OTU richness as a function of sequencing depth were constructed by sub-sampling in  
 40 increasing steps of 100 sequences per sample (the graphs were cropped at 10,000 sequences  
 41 per sample for clarity). Individual samples are colored by treatment groups.

42

43

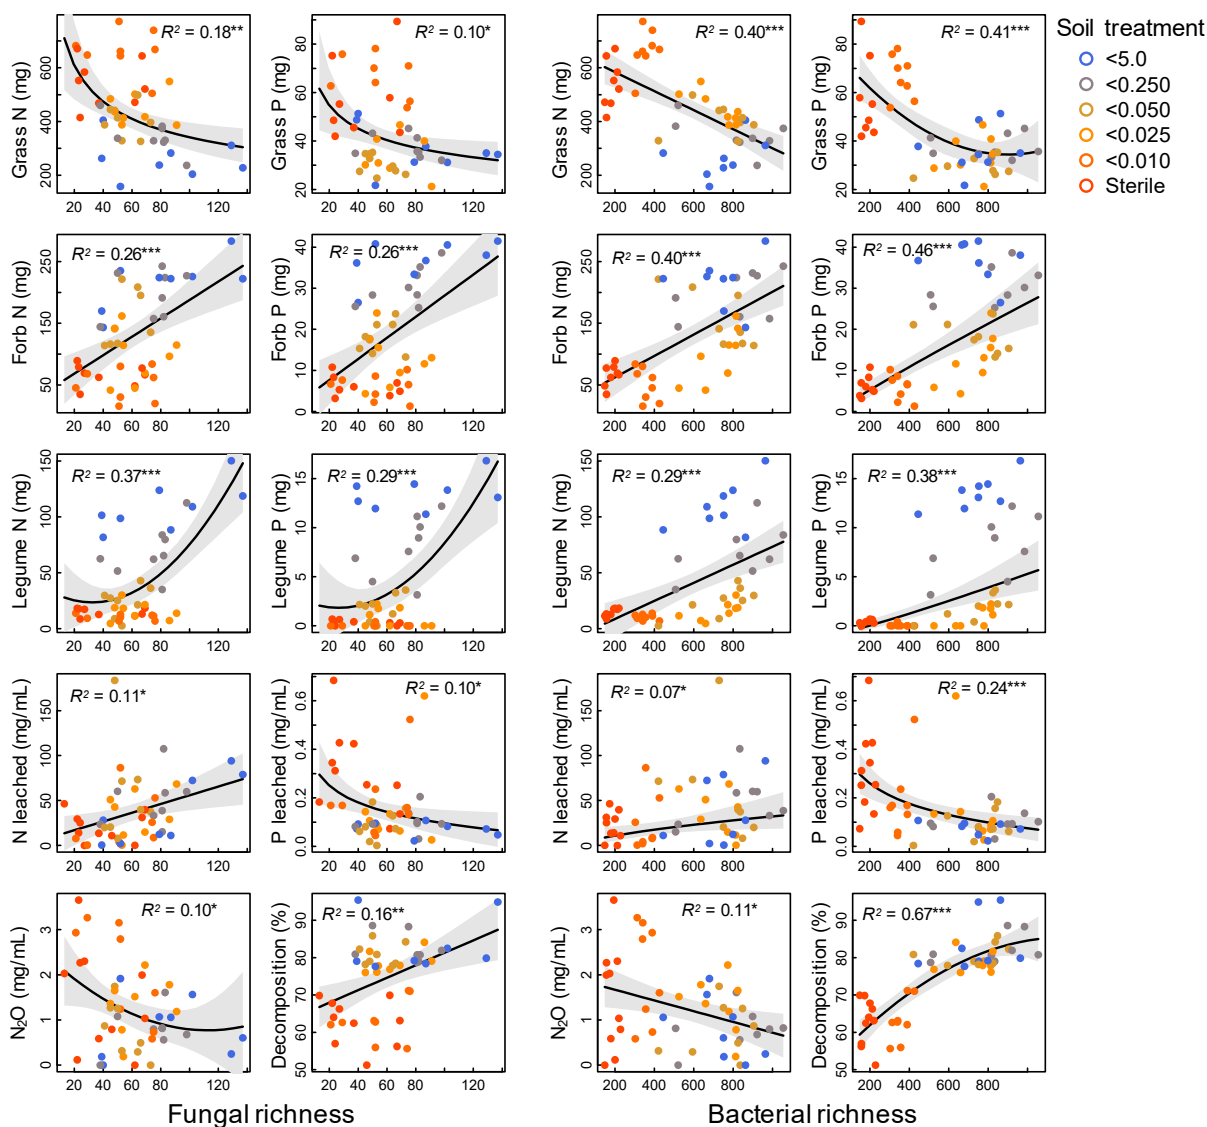

45  
46  
47  
48  
49  
50  
51  
52  
53

**Fig. S2. Relationships between microbial richness and ecosystem functions.** Relationships between fungal and bacterial OTU richness and ecosystem functions are shown. Points are colored by the filtering treatment. Solid lines are regression fits with the shaded region indicating the 95% confidence band. Relationships were fit using the best fitting regression (based on adjusted  $R^2$  shown within each panel) using linear, second order polynomial and power function (log-log). Significance for the fit is indicated by \* $P < 0.05$ , \*\* $P < 0.01$  and \*\*\* $P < 0.001$ .

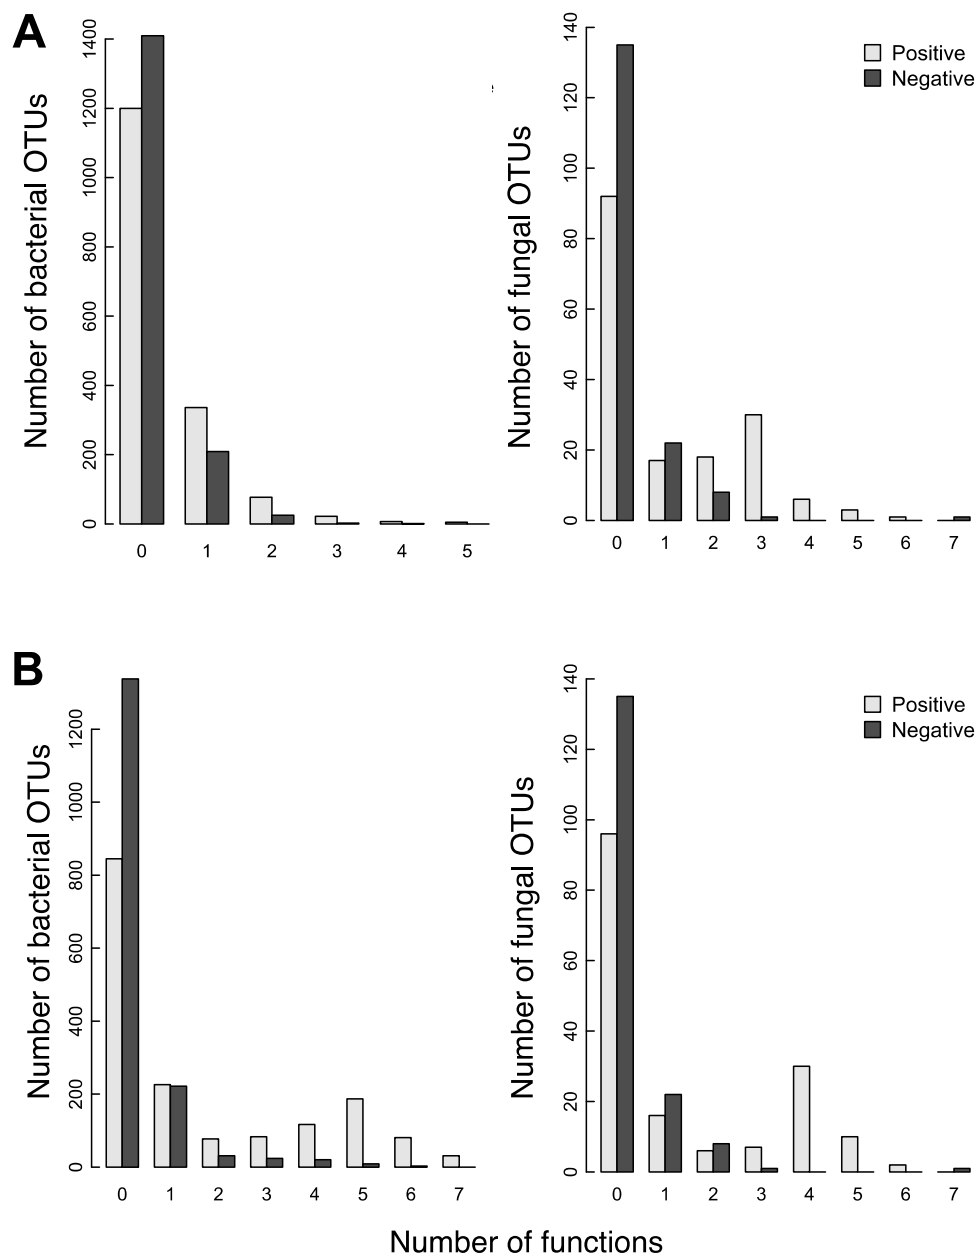

54

55 **Fig. S3. Number of taxa associated with number of functions.** (A) Using the elastic net  
 56 method to simultaneously identify taxa that together best predict ecosystem functions and (B)  
 57 using randomization tests considering each taxa independently to identify taxa that  
 58 significantly (95% CI) relate to a function.

59

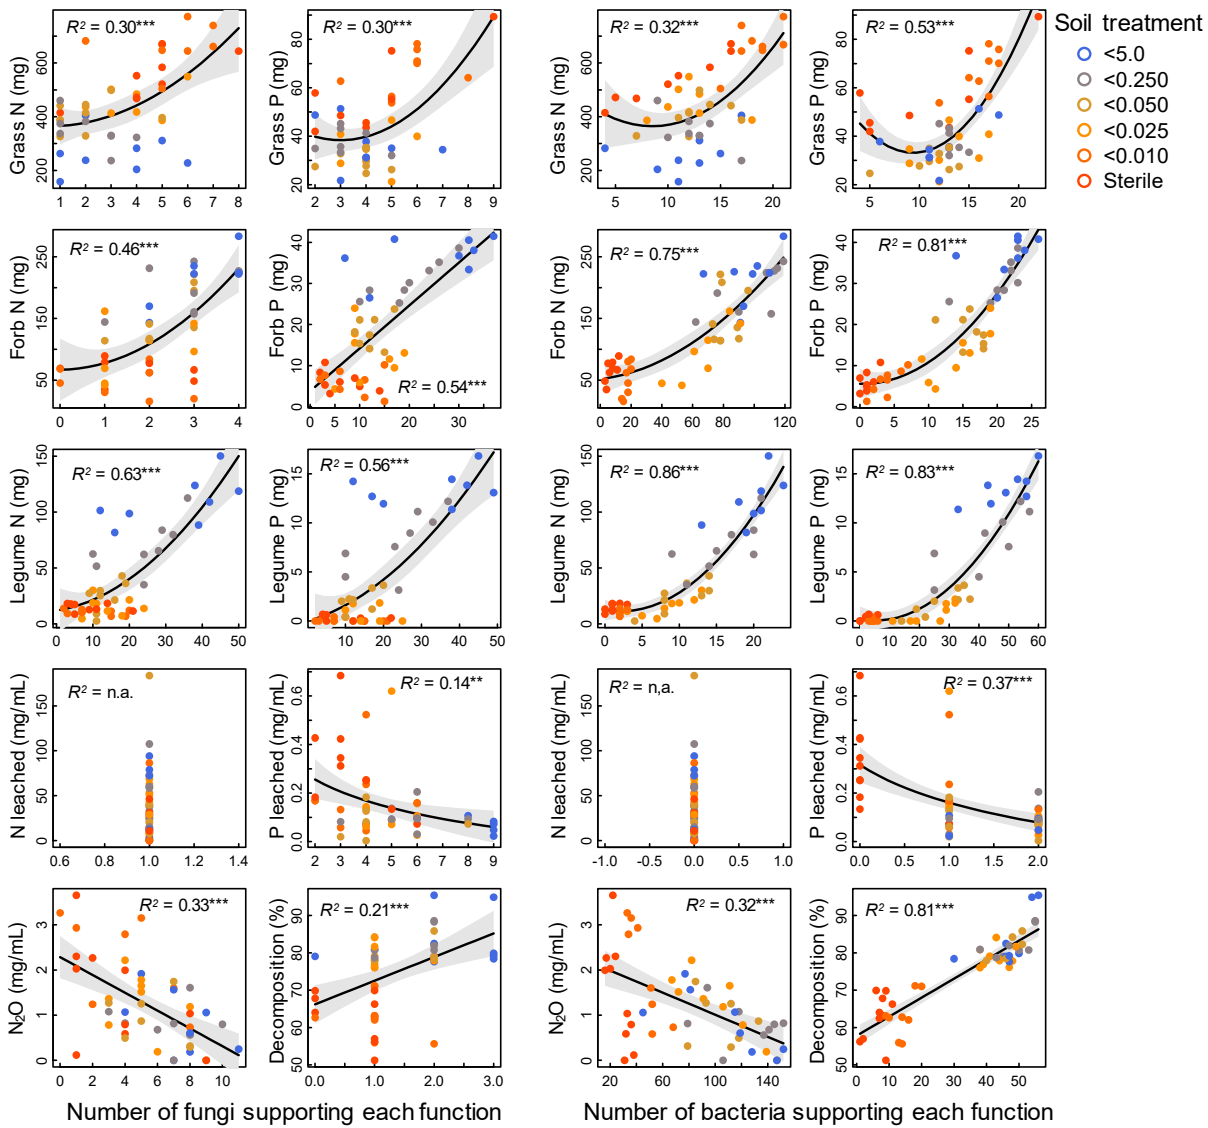

60  
61  
62  
63  
64  
65  
66  
67  
68  
69  
70  
71  
72  
73

**Fig. S4. Relationships between each ecosystem function and the number of taxa present found to support each function.** Relationships between the number of fungal and bacterial OTUs present that were found to support each function and the ecosystem function itself are shown. Points are colored by the filtering treatment. Solid lines are regression fits with the shaded region indicating the 95% confidence band. Relationships were fit using the best fitting regression (based on adjusted  $R^2$  shown within each panel) using linear, second order polynomial and power function (log-log). Significance for the fit is indicated by  $*P < 0.05$ ,  $**P < 0.01$  and  $***P < 0.001$ . Note that there was only one fungal OTU detected who's abundance could predict a reduction in N leaching, which was an OTU present in every microcosm. Resultantly there are no relationships between N leaching and the taxa that best predict its reduction as indicated by  $R^2 = \text{n.a.}$

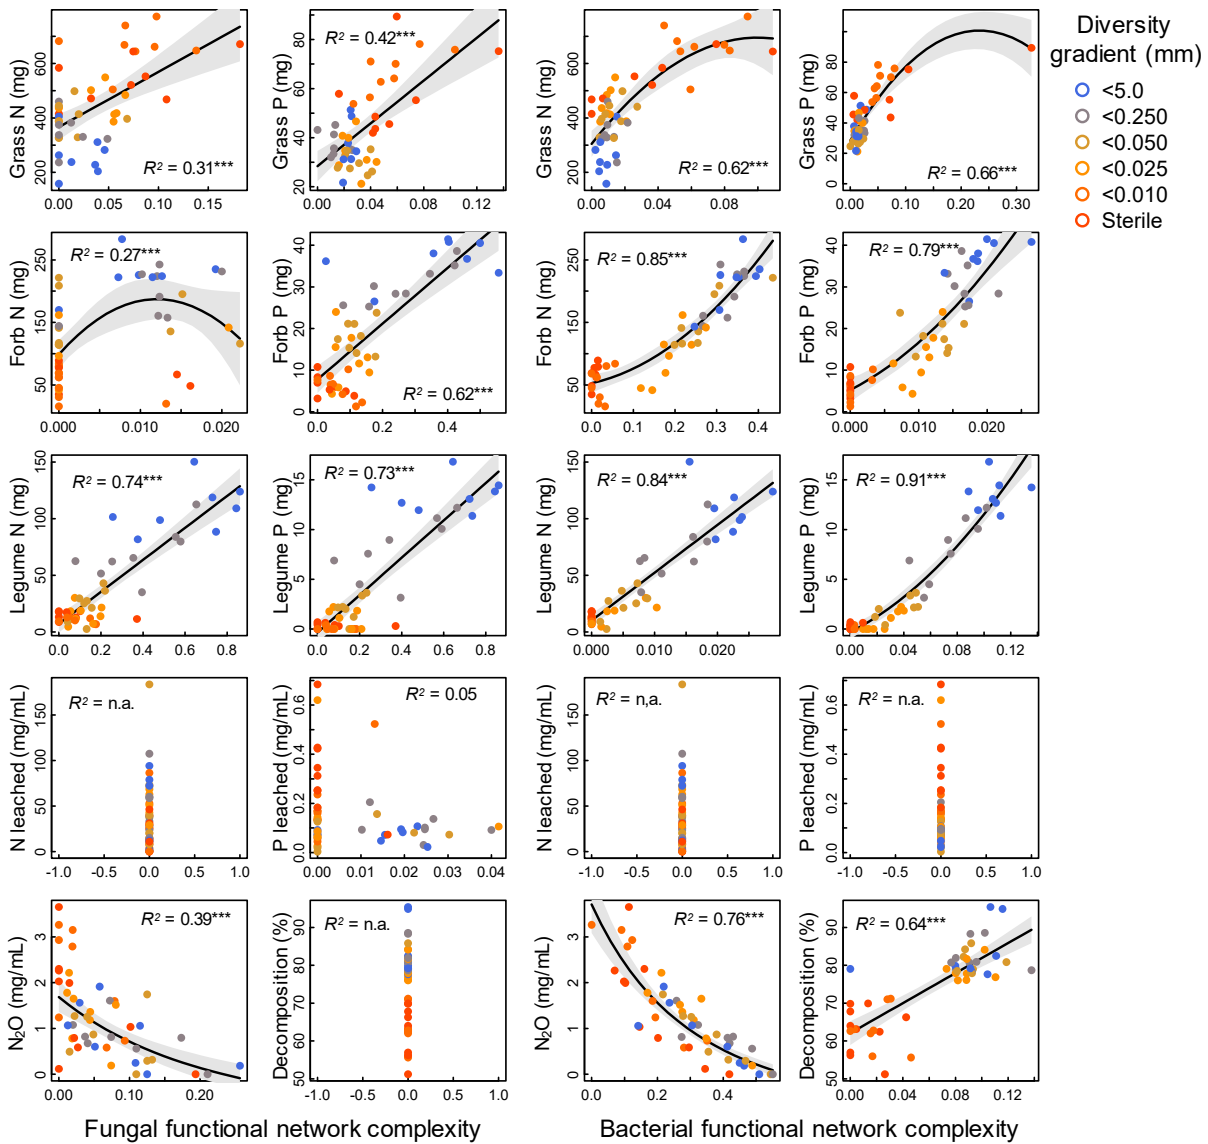

74  
 75 **Fig. S5. Relationships between each ecosystem function and the fungal-fungal and**  
 76 **bacterial-bacterial network complexity among taxa that support each function.** Points are  
 77 colored by the filtering treatment. Solid lines are regression fits with the shaded region  
 78 indicating the 95% confidence band. Relationships were fit using the best fitting regression  
 79 (based on adjusted  $R^2$  shown within each panel) using linear, second order polynomial and  
 80 power function (log-log). Significance for the fit is indicated by \* $P < 0.05$ , \*\* $P < 0.01$  and  
 81 \*\*\* $P < 0.001$ .  
 82  
 83

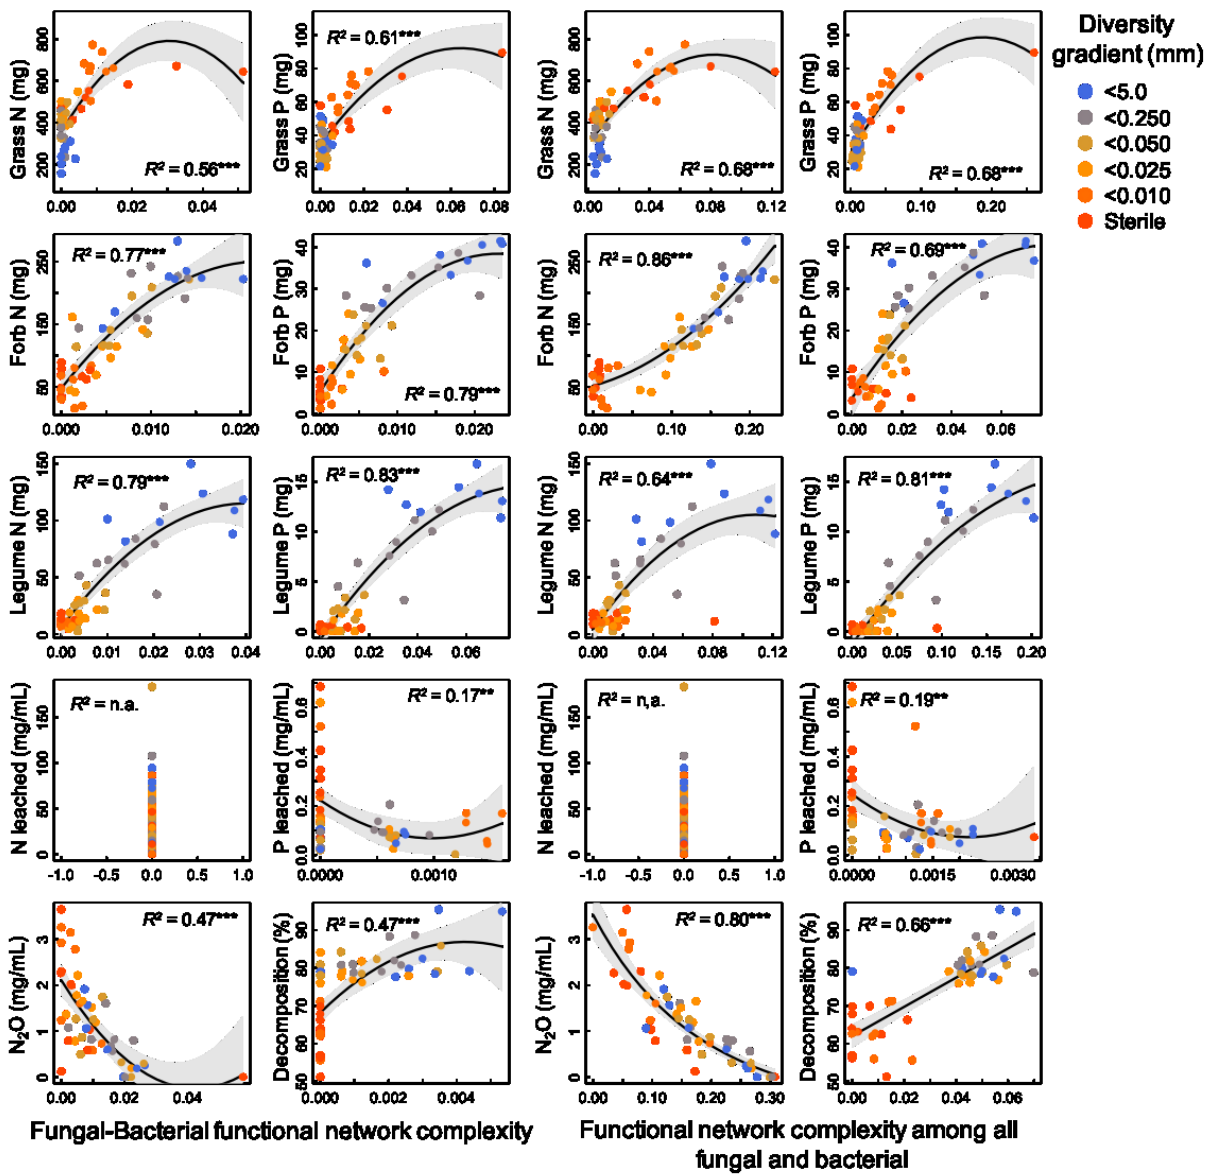

84  
85  
86  
87  
88  
89  
90  
91  
92

**Fig. S6. Relationships between each ecosystem function and the network complexity among fungi-bacteria only and among all fungi and bacteria taxa that support each function.** Points are colored by the filtering treatment. Solid lines are regression fits with the shaded region indicating the 95% confidence band. Relationships were fit using the best fitting regression (based on adjusted  $R^2$  shown within each panel) using linear, second order polynomial and power function (log-log). Significance for the fit is indicated by \* $P < 0.05$ , \*\* $P < 0.01$  and \*\*\* $P < 0.001$ .

93 **Table S1. Microbial community characteristics for each soil treatments.** The mean of each  
 94 sieving treatment is provided. The  $F$ -ratio and degrees of freedom are provided for the  
 95 variation across all treatments.  $\xi$  is the  $F$ -ratio and degrees of freedom for the variation among  
 96 treatments after first accounting for the ‘Sterile’ treatment. Significance is indicated by \*  $P <$   
 97 0.05, \*\*  $P < 0.01$ , \*\*\*  $P < 0.001$ .

|                                              | $F_{5, 37}$ | $\xi F_{4, 37}$ | < 5.0   | < 0.250 | < 0.050 | < 0.025 | < 0.010 | Sterile |
|----------------------------------------------|-------------|-----------------|---------|---------|---------|---------|---------|---------|
| <b>Bacteria</b>                              |             |                 |         |         |         |         |         |         |
| Richness                                     | ***44.8     | ***20.2         | 740.25  | 817.63  | 738.63  | 728.13  | 357.25  | 183.73  |
| Positive                                     | ***52.3     | ***28.9         | 248.63  | 261.88  | 226.25  | 202.38  | 91.13   | 49.87   |
| Negative                                     | ***22.8     | 2.6             | 108.38  | 116.38  | 116.63  | 126.75  | 104.25  | 58.69   |
| Uniqueness                                   | ***23.7     | ***20.8         | 0.097   | 0.088   | 0.075   | 0.065   | 0.043   | 0.046   |
| Links                                        | ***28.0     | ***15.2         | 7347.88 | 9027.00 | 7463.38 | 7174.50 | 2419.50 | 880.03  |
| Complexity                                   | ***46.9     | ***18.5         | 9.67    | 10.67   | 9.84    | 9.74    | 6.73    | 4.82    |
| + Complexity                                 | ***40.3     | ***31.7         | 0.94    | 0.95    | 0.81    | 0.65    | 0.33    | 0.33    |
| - Complexity                                 | **12.8      | ***14.5         | 0.25    | 0.23    | 0.26    | 0.31    | 0.67    | 0.46    |
| <b>Fungi</b>                                 |             |                 |         |         |         |         |         |         |
| Richness                                     | **3.9       | 2.4             | 83.13   | 73.50   | 55.00   | 63.50   | 53.75   | 39.70   |
| Positive                                     | ***5.9      | **5.3           | 44.25   | 34.38   | 23.75   | 25.50   | 22.50   | 18.44   |
| Negative                                     | 1.8         | 1.6             | 15.63   | 12.38   | 9.88    | 13.88   | 13.75   | 10.23   |
| Uniqueness                                   | **4.8       | ***6.0          | 0.261   | 0.213   | 0.177   | 0.115   | 0.152   | 0.192   |
| Links                                        | **5.1       | **4.0           | 203.00  | 160.88  | 101.88  | 119.00  | 94.75   | 65.31   |
| Complexity                                   | ***6.8      | **4.2           | 2.34    | 2.14    | 1.82    | 1.84    | 1.65    | 1.39    |
| + Complexity                                 | ***18.3     | ***19.3         | 1.76    | 1.18    | 0.54    | 0.44    | 0.42    | 0.36    |
| - Complexity                                 | ***8.5      | **4.2           | 0.10    | 0.07    | 0.08    | 0.12    | 0.18    | 0.22    |
| <b>Fungi-Bact.</b>                           |             |                 |         |         |         |         |         |         |
| Richness†                                    | ***21.9     | ***9.61         | 0.65    | 0.66    | 0.55    | 0.58    | 0.37    | 0.23    |
| Positive†                                    | ***35.3     | ***23.0         | 0.67    | 0.60    | 0.45    | 0.42    | 0.22    | 0.20    |
| Negative†                                    | ***8.2      | 1.2             | 0.69    | 0.65    | 0.63    | 0.73    | 0.67    | 0.46    |
| Uniqueness                                   | ***8.1      | ***10.0         | 0.178   | 0.135   | 0.108   | 0.082   | 0.099   | 0.111   |
| Links                                        | ***13.5     | ***8.0          | 656.69  | 652.00  | 457.19  | 509.50  | 222.06  | 117.50  |
| Complexity                                   | *3.5        | *2.8            | 0.78    | 0.72    | 0.58    | 0.65    | 0.53    | 0.50    |
| + Complexity                                 | ***17.8     | ***21.2         | 0.23    | 0.15    | 0.08    | 0.06    | 0.06    | 0.08    |
| - Complexity                                 | ***7.6      | *3.4            | 0.03    | 0.03    | 0.03    | 0.04    | 0.08    | 0.10    |
| <b>Network characteristic among all taxa</b> |             |                 |         |         |         |         |         |         |
| Links                                        | ***28.4     | ***15.4         | 8207.56 | 9839.88 | 8022.44 | 7803.00 | 2736.31 | 1062.84 |
| Complexity                                   | ***48.3     | ***19.7         | 9.73    | 10.68   | 9.86    | 9.75    | 6.63    | 4.77    |
| + Complexity                                 | ***44.4     | ***39.9         | 1.28    | 1.13    | 0.87    | 0.69    | 0.40    | 0.43    |
| - Complexity                                 | ***11.7     | ***12.5         | 0.27    | 0.24    | 0.27    | 0.33    | 0.69    | 0.52    |

98 Note: All richness measures are number of OTUs (‘Richness’, Richness of OTUs with  
 99 ‘Positive’ or ‘Negative’ coefficients to ecosystem functions). Links are number of links  
 100 between OTUs (among ‘Bacteria’ only, ‘Fungi’ only, ‘Fungi-Bacteria’ only, or among ‘All’  
 101 fungi and bacteria). Complexity refers to the number of network links per OTUs (nodes). †  
 102 indices are the average of the scaled (between 1 and 0) values of fungi and bacteria.



103 **Table S2. Microbial network complexity characteristics for each soil treatments after de-**  
 104 **trending for richness.** The mean of each sieving treatment is provided. The  $F$ -ratio and  
 105 degrees of freedom are provided.  $\xi$  is the  $F$ -ratio and degrees of freedom for the variation  
 106 among treatments after first accounting for the ‘Sterile’ treatment. Significance is indicated by  
 107 \*  $P < 0.05$ , \*\*  $P < 0.01$ , \*\*\*  $P < 0.001$ .

|                    | $F_{5, 37}$ | $\xi F_{4, 37}$ | < 5.0 | < 0.250 | < 0.050 | < 0.025 | < 0.010 | Sterile |
|--------------------|-------------|-----------------|-------|---------|---------|---------|---------|---------|
| <b>Bacteria</b>    |             |                 |       |         |         |         |         |         |
| Complexity         | ***5.8      | ***6.2          | 8.24  | 8.55    | 8.42    | 8.41    | 8.69    | 8.31    |
| + Complexity       | ***5.7      | ***7.2          | 0.81  | 0.75    | 0.68    | 0.52    | 0.52    | 0.66    |
| - Complexity       | **4.8       | **5.3           | 0.32  | 0.33    | 0.32    | 0.37    | 0.58    | 0.30    |
| <b>Fungi</b>       |             |                 |       |         |         |         |         |         |
| Complexity         | 1.7         | 1.2             | 1.99  | 1.94    | 1.90    | 1.79    | 1.75    | 1.70    |
| + Complexity       | ***11.8     | ***14.7         | 1.36  | 0.96    | 0.64    | 0.39    | 0.54    | 0.71    |
| - Complexity       | **4.9       | *3.0            | 0.13  | 0.08    | 0.08    | 0.12    | 0.17    | 0.20    |
| <b>Fungi-Bact.</b> |             |                 |       |         |         |         |         |         |
| Complexity         | 2.3         | 2.0             | 0.62  | 0.63    | 0.62    | 0.62    | 0.58    | 0.64    |
| + Complexity       | ***15.5     | ***18.7         | 0.19  | 0.13    | 0.09    | 0.05    | 0.07    | 0.13    |
| - Complexity       | 0.5         | 0.3             | 0.05  | 0.05    | 0.04    | 0.05    | 0.06    | 0.06    |
| <b>All</b>         |             |                 |       |         |         |         |         |         |
| Complexity         | **3.9       | **3.9           | 8.28  | 8.53    | 8.41    | 8.40    | 8.62    | 8.32    |
| + Complexity       | ***10.2     | ***12.6         | 1.04  | 0.89    | 0.80    | 0.57    | 0.59    | 0.83    |
| - Complexity       | **3.8       | *4.3            | 0.37  | 0.35    | 0.32    | 0.39    | 0.60    | 0.34    |

108 Note: All richness measures are number of OTUs (‘Richness’, Richness of OTUs with  
 109 ‘Positive’ or ‘Negative’ coefficients). All network characteristics are number of links between  
 110 OTUs (among ‘Bacteria’ only, ‘Fungi’ only, ‘Fungi-Bacteria’ only, or among ‘All’ fungi and  
 111 bacteria). Complexity refers to the number of network links per number of OTUs (nodes). †  
 112 indices are the average of the scaled (between 1 and 0) values of fungi and bacteria.

113 **Table S3.** ANOVA results for each ecosystem function and their composite multifunctional  
 114 variable in relationship to fungal and bacterial OTU richness. Relationships were fit using  
 115 linear regression (Linear) second order polynomial (Poly) and power function (Power). The  
 116 sieving treatment was fit after to capture the residual variation among treatments in functioning  
 117 that is not explained by fungal and bacterial richness and is highlighted in bold when  
 118 significant ( $P < 0.05$ ).

| Function         | Terms         | Df       | Bacterial richness |              |                  | Terms         | Df       | Fungal richness |              |                  |
|------------------|---------------|----------|--------------------|--------------|------------------|---------------|----------|-----------------|--------------|------------------|
|                  |               |          | MS                 | F            | P                |               |          | MS              | F            | P                |
| Grass N          | Linear        | 1        | 428084.70          | 82.29        | <0.001           | Power         | 1        | 1.19            | 36.71        | <0.001           |
|                  | <b>Treat.</b> | <b>5</b> | <b>79304.32</b>    | <b>15.24</b> | <b>&lt;0.001</b> | <b>Treat.</b> | <b>5</b> | <b>0.68</b>     | <b>21.03</b> | <b>&lt;0.001</b> |
|                  | Resid.        | 41       | 5202.13            |              |                  | Resid.        | 41       | 0.03            |              |                  |
| Grass P          | Poly          | 2        | 2711.44            | 28.13        | <0.001           | Power         | 1        | 0.68            | 16.41        | <0.001           |
|                  | <b>Treat.</b> | <b>5</b> | <b>651.02</b>      | <b>6.75</b>  | <b>&lt;0.001</b> | <b>Treat.</b> | <b>5</b> | <b>0.63</b>     | <b>15.24</b> | <b>&lt;0.001</b> |
|                  | Resid.        | 40       | 96.41              |              |                  | Resid.        | 41       | 0.04            |              |                  |
| Forb N           | Linear        | 1        | 102485.80          | 73.10        | <0.001           | Linear        | 1        | 68987.72        | 54.76        | <0.001           |
|                  | <b>Treat.</b> | <b>5</b> | <b>17918.36</b>    | <b>12.78</b> | <b>&lt;0.001</b> | <b>Treat.</b> | <b>5</b> | <b>25784.53</b> | <b>20.47</b> | <b>&lt;0.001</b> |
|                  | Resid.        | 41       | 1402.02            |              |                  | Resid.        | 41       | 1259.76         |              |                  |
| Forb P           | Power         | 1        | 13.34              | 101.90       | <0.001           | Linear        | 1        | 2045.12         | 107.06       | <0.001           |
|                  | <b>Treat.</b> | <b>5</b> | <b>1.94</b>        | <b>14.83</b> | <b>&lt;0.001</b> | <b>Treat.</b> | <b>5</b> | <b>913.95</b>   | <b>47.85</b> | <b>&lt;0.001</b> |
|                  | Resid.        | 41       | 0.13               |              |                  | Resid.        | 41       | 19.10           |              |                  |
| Legume N         | Linear        | 1        | 22193.08           | 154.00       | <0.001           | Poly          | 2        | 14468.44        | 86.80        | <0.001           |
|                  | <b>Treat.</b> | <b>5</b> | <b>8903.54</b>     | <b>61.78</b> | <b>&lt;0.001</b> | <b>Treat.</b> | <b>5</b> | <b>7402.93</b>  | <b>44.41</b> | <b>&lt;0.001</b> |
|                  | Resid.        | 41       | 144.11             |              |                  | Resid.        | 40       | 166.69          |              |                  |
| Legume P         | Power         | 1        | 20.01              | 232.19       | <0.001           | Poly          | 2        | 211.76          | 84.97        | <0.001           |
|                  | <b>Treat.</b> | <b>5</b> | <b>5.59</b>        | <b>64.91</b> | <b>&lt;0.001</b> | <b>Treat.</b> | <b>5</b> | <b>158.62</b>   | <b>63.64</b> | <b>&lt;0.001</b> |
|                  | Resid.        | 41       | 0.09               |              |                  | Resid.        | 40       | 2.49            |              |                  |
| N leaching       | Power         | 1        | 7.21               | 4.50         | 0.040            | Linear        | 1        | 7914.27         | 7.44         | 0.009            |
|                  | Treat.        | 5        | 1.22               | 0.76         | 0.582            | Treat.        | 5        | 1295.12         | 1.22         | 0.317            |
|                  | Resid.        | 43       | 1.60               |              |                  | Resid.        | 43       | 1063.82         |              |                  |
| P leaching       | Power         | 1        | 0.17               | 16.96        | <0.001           | Power         | 1        | 0.08            | 7.68         | 0.008            |
|                  | Treat.        | 5        | 0.01               | 1.23         | 0.314            | <b>Treat.</b> | <b>5</b> | <b>0.03</b>     | <b>3.02</b>  | <b>0.020</b>     |
|                  | Resid.        | 43       | 0.01               |              |                  | Resid.        | 43       | 0.01            |              |                  |
| N <sub>2</sub> O | Linear        | 1        | 5.24               | 7.31         | 0.010            | Poly          | 2        | 2.70            | 4.02         | 0.025            |
|                  | Treat.        | 5        | 1.03               | 1.43         | 0.232            | Treat.        | 5        | 1.52            | 2.26         | 0.066            |
|                  | Resid.        | 43       | 0.72               |              |                  | Resid.        | 42       | 0.67            |              |                  |
| Decomposition    | Poly          | 2        | 1771.26            | 66.48        | <0.001           | Linear        | 1        | 932.97          | 33.60        | <0.001           |
|                  | <b>Treat.</b> | <b>5</b> | <b>108.34</b>      | <b>4.07</b>  | <b>0.004</b>     | <b>Treat.</b> | <b>5</b> | <b>615.23</b>   | <b>22.15</b> | <b>&lt;0.001</b> |
|                  | Resid.        | 42       | 26.64              |              |                  | Resid.        | 43       | 27.77           |              |                  |
| Multifunction.   | Linear        | 1        | 2.04               | 288.53       | <0.001           | Linear        | 1        | 1.28            | 193.5        | <0.001           |
|                  | <b>Treat.</b> | <b>5</b> | <b>0.33</b>        | <b>46.09</b> | <b>&lt;0.001</b> | <b>Treat.</b> | <b>5</b> | <b>0.48</b>     | <b>72.3</b>  | <b>&lt;0.001</b> |
|                  | Resid.        | 41       | 0.01               |              |                  | Resid.        | 41       | 0.01            |              |                  |

119

120 **Table S4. Taxonomy of soil fungi and bacteria linked to functions.** Number of fungal  
 121 OTUs per fungal class with positive/negative coefficients for predicting a given ecosystem  
 122 function (by column). Note that positive here refers to reducing nutrient leaching and N<sub>2</sub>O  
 123 emissions.

| Fungal class          | N   | Decom. | N <sub>2</sub> O | P leach. | N leach. | Leg. N | Gr. N | Forb N | Leg. P | Gr. P | Forb P |
|-----------------------|-----|--------|------------------|----------|----------|--------|-------|--------|--------|-------|--------|
| Agaricomycetes        | 55  | 1/1    | 5/1              | 0/3      | 0/1      | 13/0   | 2/0   | 0/0    | 12/0   | 3/0   | 9/0    |
| Chytridiomycetes      | 7   | 0/0    | 1/0              | 0/0      | 0/1      | 3/0    | 0/1   | 1/0    | 3/0    | 0/2   | 3/0    |
| Cystobasidiomycetes   | 1   | 0/0    | 0/0              | 0/0      | 0/0      | 1/0    | 0/1   | 0/0    | 1/0    | 0/0   | 1/0    |
| Dothideomycetes       | 14  | 0/1    | 2/2              | 1/4      | 1/0      | 3/0    | 2/0   | 1/0    | 3/0    | 4/0   | 3/2    |
| Eurotiomycetes        | 13  | 0/0    | 0/1              | 1/3      | 0/0      | 4/0    | 2/1   | 1/0    | 4/0    | 0/0   | 3/0    |
| Glomeromycetes        | 5   | 1/0    | 1/0              | 1/0      | 0/0      | 2/0    | 0/1   | 0/0    | 2/0    | 0/0   | 1/0    |
| Lecanoromycetes       | 3   | 0/0    | 0/0              | 1/1      | 0/0      | 1/0    | 0/0   | 0/0    | 1/0    | 0/0   | 0/0    |
| Leotiomycetes         | 4   | 0/0    | 0/0              | 0/0      | 0/0      | 1/0    | 0/0   | 0/0    | 1/0    | 0/0   | 1/0    |
| Orbiliomycetes        | 3   | 0/0    | 0/0              | 0/1      | 0/0      | 1/0    | 0/1   | 0/0    | 1/0    | 0/0   | 1/0    |
| Pezizomycetes         | 11  | 0/0    | 1/0              | 1/0      | 0/1      | 4/0    | 0/1   | 0/0    | 5/0    | 0/0   | 2/0    |
| Pucciniomycetes       | 3   | 0/0    | 0/0              | 0/0      | 0/0      | 1/0    | 0/0   | 0/0    | 1/0    | 0/0   | 1/0    |
| Saccharomycetes       | 7   | 0/0    | 0/0              | 0/0      | 0/2      | 2/0    | 1/0   | 0/0    | 2/0    | 1/0   | 1/0    |
| Sordariomycetes       | 37  | 1/1    | 2/4              | 4/3      | 0/0      | 13/0   | 1/1   | 1/0    | 13/0   | 1/0   | 9/2    |
| Tremellomycetes       | 4   | 0/0    | 0/0              | 0/0      | 0/0      | 3/0    | 0/1   | 0/0    | 3/0    | 0/0   | 3/0    |
| Bacterial class       | N   | Decom. | N <sub>2</sub> O | P leach. | N leach. | Leg. N | Gr. N | Forb N | Leg. P | Gr. P | Forb P |
| Actinobacteria        | 128 | 4/1    | 15/12            | 0/0      | 0/0      | 3/0    | 1/0   | 15/3   | 10/0   | 0/2   | 6/2    |
| Alphaproteobacteria   | 167 | 7/4    | 24/15            | 1/2      | 0/1      | 1/2    | 4/4   | 14/4   | 5/4    | 4/1   | 2/2    |
| Anaerolineae          | 9   | 0/0    | 1/0              | 0/0      | 0/0      | 0/0    | 0/1   | 0/0    | 0/0    | 0/0   | 0/0    |
| Aquificae             | 4   | 1/0    | 0/0              | 0/0      | 0/0      | 1/0    | 0/1   | 1/0    | 1/0    | 0/0   | 0/0    |
| Armatimonadia         | 1   | 0/0    | 0/0              | 0/1      | 0/0      | 0/0    | 0/0   | 0/0    | 0/0    | 0/0   | 0/0    |
| Bacilli               | 131 | 4/5    | 15/19            | 0/1      | 0/0      | 1/0    | 3/0   | 10/1   | 4/0    | 3/0   | 3/0    |
| Bacteroidia           | 13  | 0/0    | 5/3              | 0/0      | 0/0      | 0/0    | 0/0   | 2/0    | 1/0    | 0/0   | 0/0    |
| Betaproteobacteria    | 63  | 1/0    | 6/12             | 0/0      | 0/0      | 3/0    | 1/2   | 5/1    | 5/0    | 1/1   | 1/0    |
| Caldilineae           | 9   | 0/0    | 2/1              | 0/0      | 0/0      | 0/0    | 0/0   | 1/0    | 1/0    | 0/0   | 0/0    |
| Chlamydiae            | 20  | 0/0    | 2/0              | 0/0      | 0/0      | 0/1    | 0/0   | 0/0    | 0/1    | 0/0   | 0/0    |
| Chlorobia             | 1   | 0/0    | 0/0              | 0/0      | 0/0      | 0/0    | 0/0   | 0/0    | 1/0    | 0/0   | 0/0    |
| Chloroflexi           | 5   | 0/0    | 0/1              | 0/0      | 0/0      | 0/0    | 0/0   | 0/0    | 0/0    | 0/0   | 0/0    |
| Clostridia            | 208 | 6/0    | 31/15            | 1/0      | 0/3      | 2/0    | 3/3   | 18/6   | 5/2    | 4/4   | 2/1    |
| Deferribacteres       | 1   | 0/0    | 0/0              | 0/0      | 0/0      | 0/0    | 0/0   | 0/0    | 0/0    | 0/0   | 0/0    |
| Deltaproteobacteria   | 174 | 4/2    | 33/11            | 0/0      | 0/1      | 4/0    | 3/0   | 13/1   | 10/1   | 2/2   | 3/0    |
| Epsilonproteobacteria | 4   | 0/0    | 0/0              | 0/0      | 0/1      | 0/0    | 0/0   | 0/0    | 0/0    | 0/0   | 0/0    |
| Erysipelotrichia      | 14  | 1/0    | 0/1              | 0/0      | 0/0      | 0/0    | 0/0   | 1/1    | 0/0    | 0/0   | 0/0    |
| Fibrobacteria         | 4   | 0/0    | 0/1              | 0/0      | 0/0      | 0/0    | 0/0   | 0/0    | 0/0    | 0/0   | 0/0    |
| Flavobacteria         | 4   | 0/0    | 0/0              | 0/0      | 0/0      | 0/0    | 0/0   | 0/0    | 0/0    | 0/0   | 0/0    |
| Gammaproteobacteria   | 167 | 7/1    | 23/18            | 0/1      | 0/1      | 4/0    | 0/3   | 15/1   | 9/0    | 2/2   | 3/0    |
| Gemmatimonadetes      | 41  | 3/0    | 8/7              | 0/0      | 0/0      | 2/0    | 0/0   | 8/0    | 3/0    | 1/1   | 1/0    |
| Holophagae            | 1   | 0/0    | 1/0              | 0/0      | 0/0      | 0/0    | 0/0   | 0/0    | 0/0    | 0/0   | 0/0    |
| Ignavibacteria        | 2   | 0/0    | 0/0              | 0/0      | 0/0      | 0/0    | 0/0   | 0/0    | 0/0    | 0/0   | 0/0    |
| Ktedonobacteria       | 2   | 0/0    | 0/0              | 0/0      | 0/0      | 0/0    | 0/0   | 0/0    | 1/0    | 0/0   | 0/0    |
| Mollicutes            | 11  | 0/0    | 2/0              | 0/0      | 0/0      | 0/0    | 0/0   | 1/0    | 0/0    | 0/0   | 0/0    |
| Negativicutes         | 20  | 1/0    | 3/0              | 0/0      | 0/0      | 0/0    | 0/0   | 0/0    | 2/0    | 0/0   | 0/0    |

|                       |     |     |       |     |     |     |     |      |     |     |     |
|-----------------------|-----|-----|-------|-----|-----|-----|-----|------|-----|-----|-----|
| Nitrospira            | 8   | 0/0 | 3/0   | 0/0 | 0/0 | 0/0 | 0/0 | 2/0  | 0/1 | 0/0 | 0/0 |
| Opiritae              | 32  | 1/1 | 5/4   | 0/0 | 0/0 | 1/0 | 2/2 | 4/2  | 1/1 | 1/0 | 3/0 |
| Phycisphaerae         | 13  | 2/0 | 1/0   | 0/0 | 0/0 | 1/0 | 0/0 | 2/0  | 3/0 | 0/0 | 0/0 |
| Planctomycetacia      | 226 | 9/3 | 27/22 | 0/0 | 0/1 | 1/0 | 6/2 | 10/4 | 4/2 | 5/1 | 0/1 |
| Sphingobacteria       | 74  | 2/1 | 10/2  | 0/0 | 0/1 | 1/0 | 3/0 | 3/2  | 3/0 | 2/0 | 1/0 |
| Spirochaetes          | 12  | 0/0 | 0/0   | 0/0 | 0/0 | 0/0 | 1/0 | 1/0  | 2/0 | 1/0 | 0/0 |
| Synergistia           | 11  | 0/0 | 1/1   | 0/0 | 0/0 | 0/0 | 0/0 | 1/0  | 0/0 | 0/0 | 0/0 |
| Thermodesulfobacteria | 1   | 0/0 | 0/1   | 0/0 | 0/0 | 0/0 | 0/0 | 0/0  | 0/0 | 0/0 | 0/0 |
| Thermomicrobia        | 12  | 1/1 | 0/0   | 0/0 | 0/0 | 0/0 | 0/0 | 0/2  | 0/0 | 1/0 | 0/0 |
| Verrucomicrobiae      | 54  | 4/0 | 12/6  | 0/0 | 0/0 | 1/0 | 1/0 | 9/0  | 4/0 | 0/1 | 2/1 |

124

125

126 **Table S5. Similarity among functions in the microbial taxa they are linked to.** Shown are  
 127 the ten different ecosystem functions (diagonal) assessed in this study. Values represent  
 128 percent (%) overlap among microbial taxa (OTUs) in affecting two different ecosystem  
 129 functions for combinations of taxa that have positive coefficients (upper triangle) or negative  
 130 coefficients (lower triangle) in predicting each ecosystem function. For instance, litter  
 131 decomposition (Decom.) is associated with 7.64 % of the same microbial taxa that are  
 132 associated with reducing N<sub>2</sub>O emissions.

| Positive      |                       |                |                |              |             |               |              |             |               |
|---------------|-----------------------|----------------|----------------|--------------|-------------|---------------|--------------|-------------|---------------|
| <b>Decom.</b> | 7.64                  | 3.33           | 0.00           | 14.29        | 0.00        | 18.56         | 15.04        | 0.00        | 14.12         |
| 4.68          | <b>N<sub>2</sub>O</b> | 0.86           | 0.00           | 2.34         | 3.10        | 15.30         | 7.87         | 2.33        | 3.11          |
| 0.00          | 2.55                  | <b>P leach</b> | 0.00           | 0.00         | 0.00        | 1.45          | 0.00         | 0.00        | 0.00          |
| 0.00          | 0.00                  | 0.00           | <b>N leach</b> | 0.00         | 0.00        | 0.00          | 0.00         | 0.00        | 0.00          |
| 0.00          | 0.00                  | 0.00           | 0.00           | <b>Leg N</b> | 0.00        | 18.52         | 51.49        | 0.00        | 30.19         |
| 0.00          | 0.00                  | 0.00           | 0.00           | 0.00         | <b>Gr N</b> | 0.00          | 0.00         | 54.55       | 0.00          |
| 0.00          | 10.00                 | 0.00           | 0.00           | 6.45         | 0.00        | <b>Forb N</b> | 28.44        | 0.00        | 25.77         |
| 0.00          | 2.41                  | 0.00           | 8.70           | 23.53        | 0.00        | 4.76          | <b>Leg P</b> | 0.00        | 23.53         |
| 0.00          | 0.00                  | 0.00           | 8.33           | 0.00         | 30.30       | 0.00          | 0.00         | <b>Gr P</b> | 0.00          |
| 0.00          | 2.53                  | 0.00           | 0.00           | 22.22        | 0.00        | 29.41         | 10.00        | 0.00        | <b>Forb P</b> |

Negative

133  
 134  
 135  
 136

137 **Table S6. Effects of soil microbial community characteristics on multifunctionality using**  
 138 **randomization tests.** Based on associating OTUs to functions using randomizations test  
 139 considering each taxa independently (instead of elastic net considering all taxa  
 140 simultaneously). Effects are shown before and after de-trending community characteristics for  
 141 richness prior to analysis. Standardized effect (*SES*) and associated standard error (*SE*),  $R^2$  and  
 142 *AICc* for each community characteristic as an independent predictor. † average z-transformed  
 143 values of bacteria and fungi.

|                                                 | <i>SES</i> | <i>SE</i> | <i>P</i> | $R^2$ | <i>AICc</i> |
|-------------------------------------------------|------------|-----------|----------|-------|-------------|
| <b>Functional richness</b>                      |            |           |          |       |             |
| Bacteria (+)                                    | 0.842      | 0.083     | < 0.001  | 0.693 | 85.1        |
| Fungi (+)                                       | 0.757      | 0.097     | < 0.001  | 0.568 | 101.4       |
| †Both (+)                                       | 0.902      | 0.068     | < 0.001  | 0.792 | 66.4        |
| Bacteria (-)                                    | 0.460      | 0.136     | 0.002    | 0.199 | 131.1       |
| Fungi (-)                                       | -0.105     | 0.150     | 0.489    | 0.010 | 141.2       |
| †Both (-)                                       | 0.245      | 0.151     | 0.111    | 0.054 | 139.1       |
| <b>Functional richness (post de-trending)</b>   |            |           |          |       |             |
| Bacteria (+)                                    | 0.565      | 0.120     | < 0.001  | 0.327 | 122.8       |
| Fungi (+)                                       | 0.599      | 0.115     | < 0.001  | 0.370 | 119.6       |
| †Both (+)                                       | 0.538      | 0.124     | < 0.001  | 0.291 | 125.3       |
| Bacteria (-)                                    | -0.418     | 0.133     | 0.003    | 0.176 | 132.4       |
| Fungi (-)                                       | -0.620     | 0.117     | < 0.001  | 0.379 | 118.9       |
| †Both (-)                                       | -0.443     | 0.134     | 0.002    | 0.193 | 131.5       |
| <b>Functional complexity</b>                    |            |           |          |       |             |
| Bact-Bact (+)                                   | 0.921      | 0.059     | < 0.001  | 0.840 | 53.9        |
| Fungi-Fungi (+)                                 | 0.772      | 0.093     | < 0.001  | 0.601 | 97.6        |
| Bact-Fungi (+)                                  | 0.833      | 0.079     | < 0.001  | 0.708 | 82.7        |
| Among all (+)                                   | 0.927      | 0.057     | < 0.001  | 0.852 | 50.2        |
| Bact-Bact (-)                                   | -0.778     | 0.091     | < 0.001  | 0.613 | 96.2        |
| Fungi-Fungi (-)                                 | -0.657     | 0.113     | < 0.001  | 0.423 | 115.3       |
| Bact-Fungi (-)                                  | -0.676     | 0.108     | < 0.001  | 0.459 | 112.3       |
| Among all (-)                                   | -0.783     | 0.091     | < 0.001  | 0.619 | 95.4        |
| <b>Functional complexity (post de-trending)</b> |            |           |          |       |             |
| Bact-Bact (+)                                   | 0.567      | 0.118     | < 0.001  | 0.334 | 122.2       |
| Fungi-Fungi (+)                                 | 0.514      | 0.123     | < 0.001  | 0.274 | 126.4       |
| Bact-Fungi (+)                                  | 0.481      | 0.128     | < 0.001  | 0.234 | 129.0       |
| Among all (+)                                   | 0.520      | 0.124     | < 0.001  | 0.276 | 126.2       |
| Bact-Bact (-)                                   | -0.333     | 0.137     | 0.019    | 0.114 | 136.0       |
| Fungi-Fungi (-)                                 | -0.453     | 0.130     | 0.001    | 0.208 | 130.6       |
| Bact-Fungi (-)                                  | -0.263     | 0.145     | 0.077    | 0.067 | 138.4       |
| Among all (-)                                   | -0.301     | 0.139     | 0.036    | 0.092 | 137.1       |
